# Supplementary material for: MoS2–C/graphite, an electric energy storage device using Na+-based organic electrolytes
Source: Royal Society of Chemistry journal article supplement (doi:10.1039/c4ra14868a), 2015-01-01
Supplement: c4ra14868a1.pdf [file c4ra14868a1.pdf]

Supplementary figures for electronic-supporting information

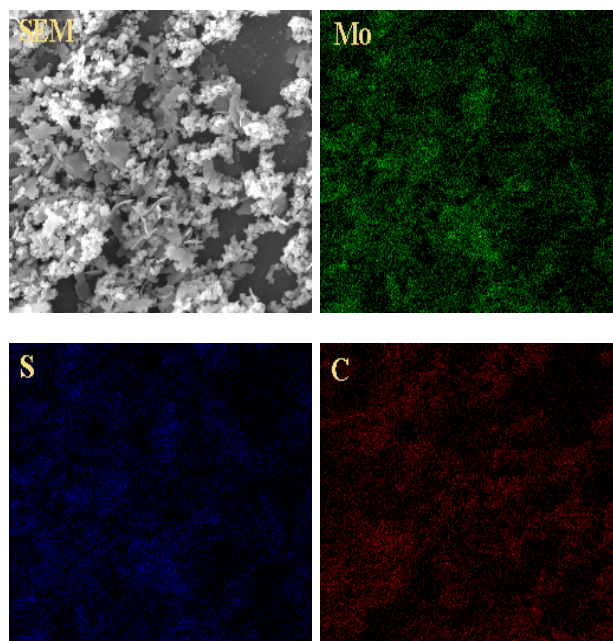

Fig. S1. SEM image of MoS<sub>2</sub>-C and the EDX mapping images of Mo, S, and C elements.

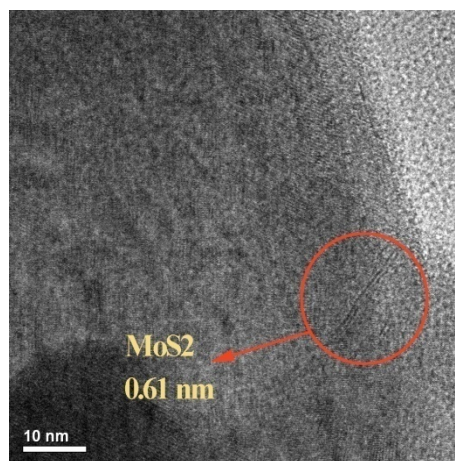

Fig. S2. HRTEM images of MoS<sub>2</sub>-C in MoS<sub>2</sub>-C/graphite devices charged to 3.7 V.
